# Supplementary material for: Distinct Host Tropism Protein Signatures to Identify Possible Zoonotic Influenza A Viruses
Source: PubMed Central journal article supplement (PMC4767729; doi:10.1371/journal.pone.0150173), 2016-02-25

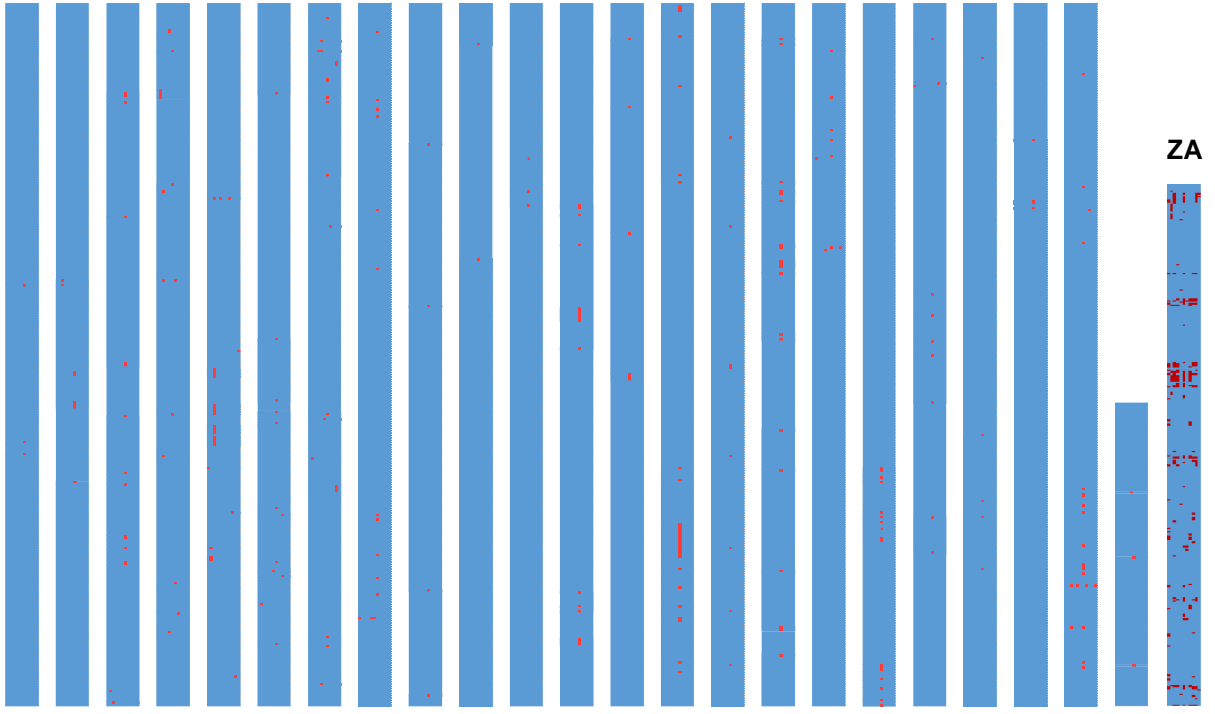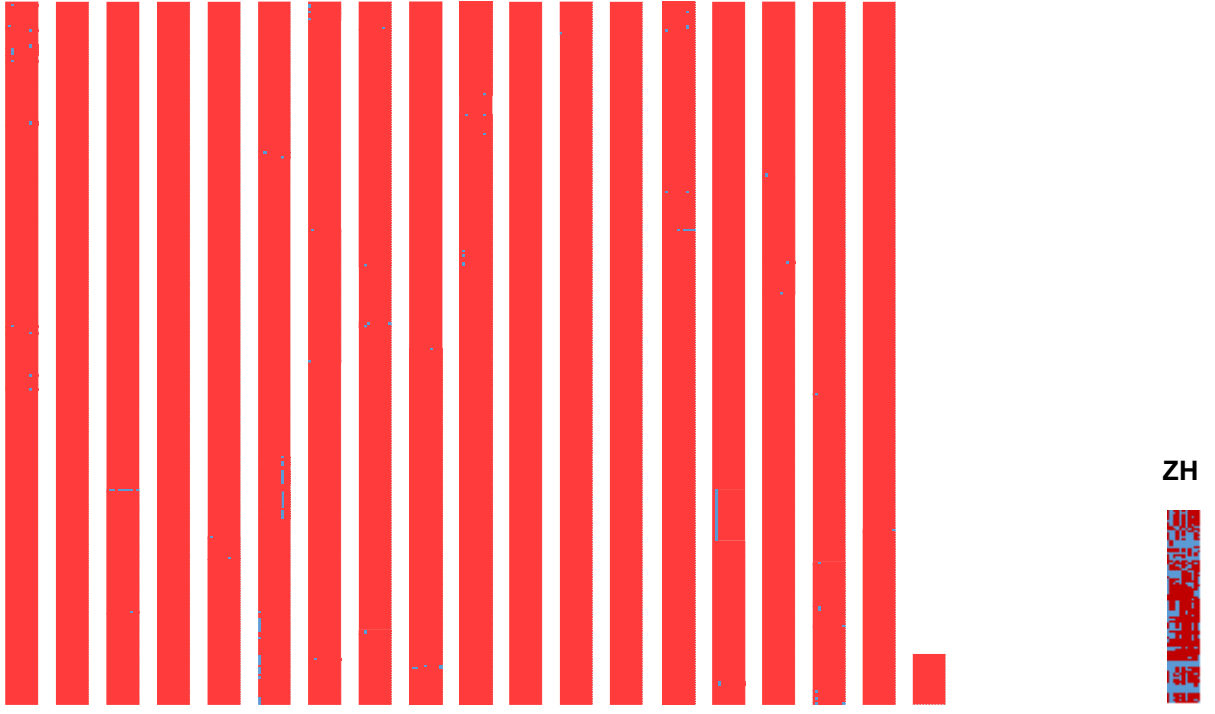

Supplement: pone.0150173.s002.pdf [file pone.0150173.s002.pdf]
