# Supplementary material for: Distinct Host Tropism Protein Signatures to Identify Possible Zoonotic Influenza A Viruses
Source: PubMed Central journal article supplement (PMC4767729; doi:10.1371/journal.pone.0150173), 2016-02-25
Supplement: pone.0150173.s004.pdf [file pone.0150173.s004.pdf]

**S1 Table. Distribution of human NS2 proteins across various avian influenza subtypes**

| <b>Subtype</b> | <b>Count</b> | <b>Subtype</b> | <b>Count</b> |
|----------------|--------------|----------------|--------------|
| H1N1           | 12           | H6N1           | 3            |
| H1N2           | 5            | H6N2           | 7            |
| H1N6           | 1            | H6N5           | 4            |
| H1N8           | 1            | H6N6           | 1            |
| H1N9           | 1            | H6N9           | 1            |
| H2N1           | 3            | H7N3           | 14           |
| H2N3           | 4            | H7N4           | 2            |
| H2N9           | 2            | H7N5           | 1            |
| H3N2           | 14           | H7N6           | 1            |
| H3N3           | 1            | H7N7           | 25           |
| H3N5           | 5            | H8N4           | 3            |
| H3N6           | 6            | H9N2           | 1            |
| H3N7           | 1            | H10N2          | 1            |
| H3N8           | 10           | H10N4          | 1            |
| H4N2           | 2            | H10N7          | 6            |
| H4N3           | 1            | H10N8          | 2            |
| H4N6           | 14           | H10N9          | 1            |
| H4N8           | 5            | H11N2          | 3            |
| H4N9           | 1            | H11N5          | 1            |
| H5N1           | 4            | H11N9          | 18           |
| H5N2           | 2            | H12N5          | 1            |
| H5N8           | 1            | mixed          | 9            |
